# Supplementary material for: The prevalence of mental health disorders in (ex-)military personnel with a physical impairment: a systematic review
Source: PubMed Central journal article supplement — Occup Environ Med. 2014 Sep 16;72(4):243–51. doi: 10.1136/oemed-2014-102207 (PMC4392233; doi:10.1136/oemed-2014-102207), 2014-09-16
Supplement: oemed-2014-102207-s1.pdf [file oemed-2014-102207-s1.pdf]

## Search strategy used in PsychInfo

- 1) exp military personnel/
- 2) exp military veterans/
- 3) exp military deployment/
- 4) exp military duty status/
- 5) "armed forces".ti,ab.
- 6) exp Disabilities/
- 7) exp Disabled Personnel/
- 8) exp communication disorders/
- 9) deaf/ or exp partially hearing impaired/
- 10) exp vision disorders/
- 11) exp Blind/
- 12) exp Amputation/
- 13) impair\*.ti,ab.
- 14) disab\*.ti,ab.
- 15) exp multiple disabilities/
- 16) exp sensory system disorders/
- 17) exp Mental Disorders/
- 18) exp Posttraumatic Stress Disorder/
- 19) exp Combat Experience/
- 20) exp Anxiety Disorders/
- 21) exp Drug Abuse/
- 22) exp suicidal ideation/
- 23) exp affective disorders/
- 24) exp Traumatic Brain Injury/
- 25) "Quality of Life"/
- 26) 1 or 2 or 3 or 4 or 5 or 19
- 27) 6 or 7 or 8 or 9 or 10 or 11 or 12 or 13 or 14 or 15 or 16
- 28) 17 or 18 or 20 or 21 or 22 or 23 or 24 or 25
- 29) 26 and 27 and 28
